# Supplementary material
Source: Springer Nature journal article supplement (https://www.springermedizin.de/resource/supplementary/12888_2012_1357_MOESM1_ESM.pdf/9479902)
Supplement: MOESM1 [file 9479902]

N = 237 (189 completers)

```
graph TD; A["N = 237 (189 completers)"] --> B["Collaborative Care + duloxetine  
N = 79 (69 completers)"]; A --> C["Collaborative Care + placebo  
N = 79 (69 completers)"]; A --> D["Duloxetine  
N = 79 (69 completers)"];
```

Collaborative Care +  
duloxetine  
N = 79 (69 completers)

Collaborative Care + placebo  
N = 79 (69 completers)

Duloxetine  
N = 79 (69 completers)
